# Supplementary figures and images for: Identification and Reproducibility of Plasma Metabolomic Biomarkers of Habitual Food Intake in a US Diet Validation Study
Source: MDPI journal article supplement (doi:10.3390/metabo10100382), 2020-09-26

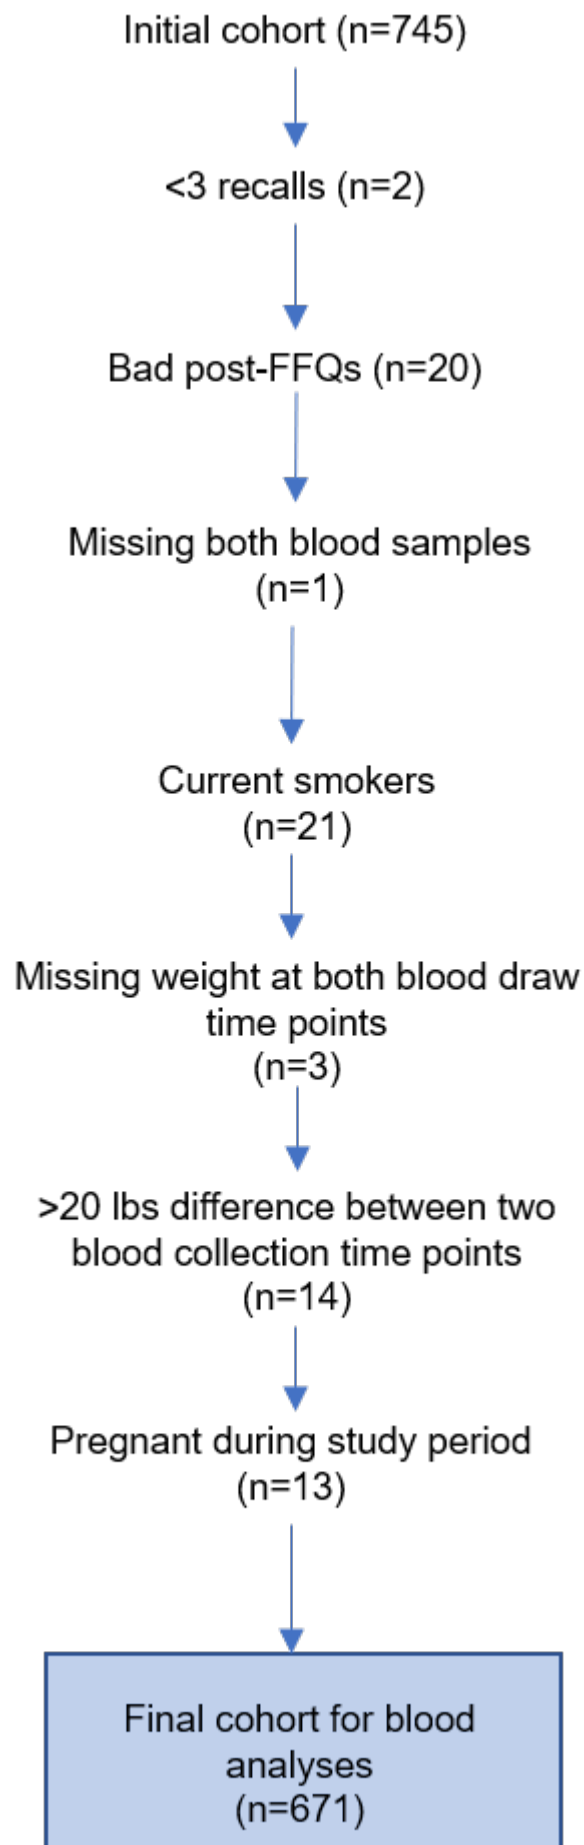

Supplement: s1 [file s1]
